# Supplementary material for: The influence of finfish aquaculture on benthic fish and crustacean assemblages in Fitzgerald Bay, South Australia
Source: PeerJ. 2015 Sep 8;3:e1238. doi: 10.7717/peerj.1238 (PMC4579018; doi:10.7717/peerj.1238)
Supplement: Supplemental Information 1 — Raw data files underpinning the analyses described. [file peerj-03-1238-s001.xlsx]

## Sheet: Local effects
	Crab	Prawn	Benthic	Carangid	Port Jackson	Snapper
SL1	3	0	3	15	1	0				N	North
SC1	2	0	4	0	1	0				S	South
NL1	0	1	2	14	0	0				L	Lease
NC1	0	2	2	0	0	0				C	Control
NC2	0	2	2	0	0	0
NC3	0	3	4	8	0	0
SC2	2	0	2	0	0	0
SC3	0	0	3	0	1	0
SC4	3	0	0	0	0	0
SL2	2	0	4	0	0	0
NL2	0	2	2	0	0	0
NC4	0	1	2	7	0	1
SL3	3	4	3	0	0	0
SC5	2	0	6	0	0	5
NL3	0	3	2	0	0	10
NL4	0	0	0	0	0	0
NL5	0	0	1	0	0	0
NC5	0	2	3	8	0	0
SL4	2	1	4	0	0	0
SC6	0	0	1	0	0	0
NC6	0	2	1	0	0	0
NL6	0	2	0	2	0	0
SL5	3	1	5	1	1	0
SL6	2	2	3	5	0	0

## Sheet: Regional effects
	Site	Crab	Benthic	Carangid	Port Jackson	Snapper	Flathead	Leatherjacket	Squid	Demersal fish 1	Demersal fish 2	Demersal fish 3	Holothurian	Unidentified crab	Flounder	Starfish
PD1	2	0	0	0	0	0	1	0	0	0	0	0	0	0	0	0		PD	Douglas Point
PD2	2	0	1	0	0	0	1	0	0	0	0	0	0	0	0	0		FB	Fitzgerald Bay
PD3	1	1	0	0	0	0	0	0	0	0	0	0	0	0	0	0		CL	Cowleds Landing
PD4	1	0	2	0	0	0	0	1	0	0	0	0	0	0	0	0
PD5	2	0	0	0	0	0	0	0	0	0	0	0	0	0	0	0
PD6	2	0	0	0	0	0	1	0	0	0	0	0	0	0	0	0
PD7	1	1	2	0	0	2	0	4	1	2	0	0	0	0	0	0
PD8	1	2	2	0	0	0	0	2	0	0	0	0	0	0	0	0
PD9	2	0	2	0	0	0	0	0	0	0	0	0	0	0	0	0
PD10	2	0	1	0	0	0	0	0	0	0	0	0	0	0	0	0
PD11	1	1	2	0	0	1	0	4	0	0	0	0	0	0	0	0
PD12	1	0	1	0	0	1	0	4	0	0	0	0	0	0	0	0
FB1	4	1	3	1	1	3	0	0	0	0	0	0	0	0	0	0
FB2	4	2	2	0	1	1	0	0	0	0	0	0	0	0	0	0
FB3	3	0	1	0	0	0	0	0	0	0	0	0	0	0	0	0
FB4	3	0	2	0	0	0	0	0	0	0	0	0	0	0	0	0
FB5	4	4	2	0	0	0	0	0	0	0	0	0	0	0	0	0
FB6	4	2	1	0	1	0	0	0	0	0	0	0	0	0	0	0
FB7	3	0	1	3	0	0	0	0	0	0	0	0	0	0	0	0
FB8	3	0	1	1	0	0	0	0	0	0	0	0	0	0	0	0
FB9	4	4	2	0	0	0	0	0	0	0	0	0	0	0	0	0
FB10	4	5	0	0	0	2	0	0	0	0	0	0	0	0	0	0
FB11	3	0	1	0	0	0	0	0	0	0	0	0	0	0	0	0
FB12	3	0	1	0	0	0	0	0	0	0	0	0	0	0	0	0
CL1	5	0	0	0	1	0	0	0	0	0	0	0	1	0	0	0
CL2	5	0	0	0	0	0	0	0	0	0	0	0	0	1	0	0
CL3	6	0	1	0	1	0	2	0	0	0	0	0	0	0	0	0
CL4	6	0	1	0	0	0	1	0	0	0	1	0	0	0	1	0
CL5	5	0	0	0	0	0	0	0	0	0	0	1	0	0	0	0
CL6	5	0	2	0	1	0	0	0	0	0	0	0	0	0	0	0
CL7	6	0	1	2	0	0	1	0	0	0	0	0	0	0	0	0
CL8	6	0	2	0	0	0	0	0	0	0	0	0	0	0	0	0
CL9	5	0	2	0	0	0	0	0	0	0	0	0	1	0	0	1
CL10	5	0	3	0	0	0	0	0	0	0	0	0	0	0	0	0
CL11	6	0	1	9	0	0	1	0	0	0	0	0	0	0	0	0
CL12	6	1	0	0	0	0	0	0	0	0	0	0	0	0	0	0

## Sheet: Bait effects
Proximity	Location	Bait	Blue crab	Benthic	Carangid	Adult snapper	Juv snapper	Leatherjacket
c	n	a	0	1	0	0	0	0			C	Control
c	n	a	0	0	0	0	0	0			L	Lease
c	n	a	0	1	15	0	0	0			N	North
c	n	a	0	0	20	0	0	0			S	South
c	n	a	0	0	0	0	0	0			A	Aquaculture pellet
l	n	a	0	0	10	4	0	0			N	No Bait
l	n	a	0	0	5	2	0	0			P	Sardines
l	n	a	0	1	0	0	0	0
l	n	a	0	0	0	6	0	0
l	n	a	0	0	5	0	0	0
c	n	n	0	0	0	0	0	0
c	n	n	0	0	0	0	0	0
c	n	n	0	2	0	0	0	0
c	n	n	0	0	0	0	0	0
c	n	n	0	1	0	0	0	0
l	n	n	0	0	0	0	0	0
l	n	n	0	0	0	0	0	0
l	n	n	0	0	0	0	0	0
l	n	n	0	1	0	0	0	0
l	n	n	0	0	0	0	0	0
c	n	p	0	1	5	0	0	0
c	n	p	0	0	10	0	0	0
c	n	p	0	0	0	0	0	0
c	n	p	0	0	20	0	0	0
c	n	p	0	0	20	0	0	0
l	n	p	0	2	60	2	0	0
l	n	p	0	0	40	1	0	0
l	n	p	0	1	20	0	0	0
l	n	p	0	0	30	0	0	0
l	n	p	0	0	0	4	0	0
c	s	a	3	0	0	0	0	0
c	s	a	1	0	0	0	1	0
c	s	a	0	0	0	0	7	0
c	s	a	0	1	0	0	0	0
c	s	a	0	0	5	0	0	0
l	s	a	0	2	15	0	0	0
l	s	a	0	0	40	0	0	0
l	s	a	0	2	40	0	0	0
l	s	a	0	1	50	0	0	0
l	s	a	0	1	20	0	0	0
c	s	n	0	1	0	0	0	0
c	s	n	0	1	0	0	0	1
c	s	n	1	0	0	0	0	0
l	s	n	0	0	0	0	0	0
l	s	n	0	0	0	0	0	0
l	s	n	0	0	0	0	0	0
c	s	p	2	1	0	0	0	0
c	s	p	3	1	0	0	10	0
c	s	p	3	0	0	0	2	0
l	s	p	2	0	0	0	5	0
l	s	p	0	0	0	0	0	0
l	s	p	0	0	20	0	0	1
l	s	p	0	3	20	0	1	0
l	s	p	0	0	5	0	0	1

## Sheet: Temporal effects
Time	Proximity	Location	Crab	Prawn	Benthic	Carangid	PtJackson	Snapper	Leatherjacket
1	l	s	3	0	3	15	1	0	0		N	North
1	c	s	2	0	4	0	1	0	0		S	South
1	l	n	0	1	2	14	0	0	0		L	Lease
1	c	n	0	2	2	0	0	0	0		C	Control
1	c	n	0	2	2	0	0	0	0
1	c	n	0	3	4	8	0	0	0
1	c	s	2	0	2	0	0	0	0
1	c	s	0	0	3	0	1	0	0
1	c	s	3	0	0	0	0	0	0
1	l	s	2	0	4	0	0	0	0
1	l	n	0	2	2	0	0	0	0
1	c	n	0	1	2	7	0	1	0
1	l	s	3	4	3	0	0	0	0
1	c	s	2	0	6	0	0	5	0
1	l	n	0	3	2	0	0	10	0
1	l	n	0	0	0	0	0	0	0
1	l	n	0	0	1	0	0	0	0
1	c	n	0	2	3	8	0	0	0
1	l	s	2	1	4	0	0	0	0
1	c	s	0	0	1	0	0	0	0
1	c	n	0	2	1	0	0	0	0
1	l	n	0	2	0	2	0	0	0
1	l	s	3	1	5	1	1	0	0
1	l	s	2	2	3	5	0	0	0
2	c	s	1	0	3	1	1	3	0
2	c	s	2	0	2	0	1	1	0
2	c	n	0	0	1	0	0	0	0
2	c	n	0	0	2	0	0	0	0
2	c	s	4	0	2	0	0	0	0
2	c	s	2	0	1	0	1	0	0
2	c	n	0	0	1	3	0	0	0
2	c	n	0	0	1	1	0	0	0
2	c	s	4	0	2	0	0	0	0
2	c	s	5	0	0	0	0	2	0
2	c	n	0	0	1	0	0	0	0
2	c	n	0	0	1	0	0	0	0
3	c	n	0	0	1	5	0	0	0
3	c	n	0	0	0	10	0	0	0
3	c	n	0	0	0	0	0	0	0
3	c	n	0	0	0	20	0	0	0
3	c	n	0	0	0	20	0	0	0
3	l	n	0	0	2	60	0	2	0
3	l	n	0	0	0	40	0	1	0
3	l	n	0	0	1	20	0	0	0
3	l	n	0	0	0	30	0	0	0
3	l	n	0	0	0	0	0	4	0
3	c	s	2	0	1	0	0	0	0
3	c	s	3	0	1	0	0	10	0
3	c	s	3	0	0	0	0	2	0
3	l	s	2	0	0	0	0	5	0
3	l	s	0	0	0	0	0	0	0
3	l	s	0	0	0	20	0	0	1
3	l	s	0	0	3	20	0	1	0
3	l	s	0	0	0	5	0	0	1
